# Supplementary material for: Brain-derived neurotrophic factor, a new soluble biomarker for malignant pleural mesothelioma involved in angiogenesis
Source: Springer Nature journal article supplement (doi:10.1186/s12943-018-0891-0), 2018-10-11
Supplement: MOESM3 [file 16191964]

**A**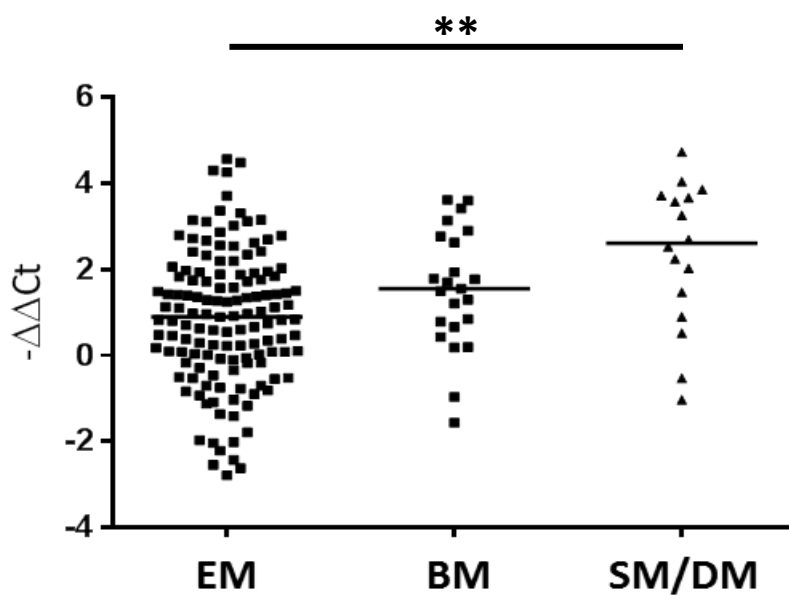**B**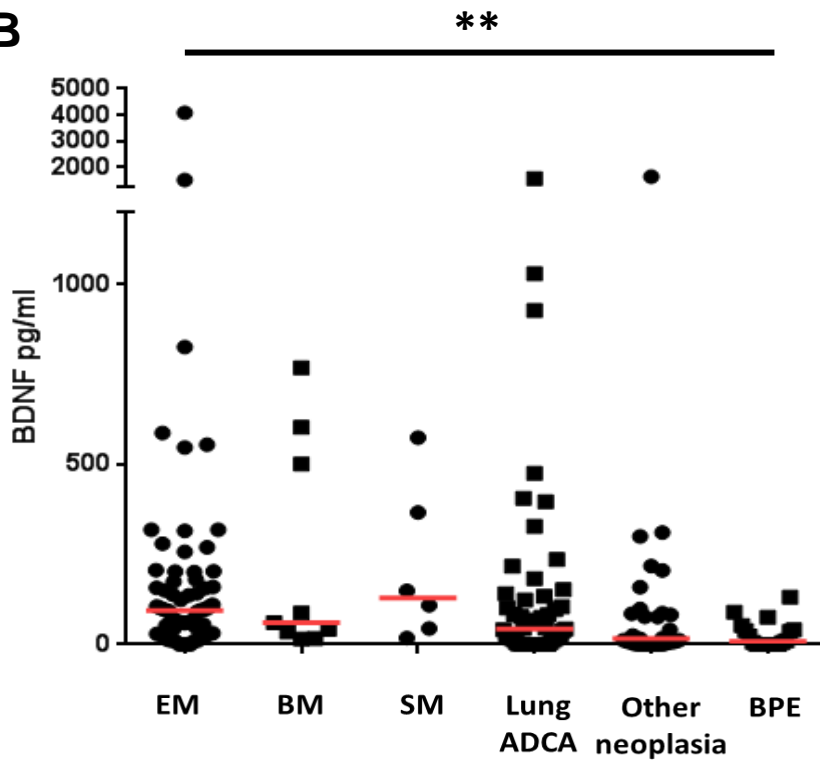

|        | EM     | BM     | SM     | Lung<br>ADCA | Other<br>neoplasia | BPE   |
|--------|--------|--------|--------|--------------|--------------------|-------|
| N=     | 67     | 9      | 6      | 51           | 34                 | 18    |
| Median | 95.32  | 60.79  | 128.80 | 42.78        | 16.70              | 8.87  |
| Mean   | 214.10 | 237.00 | 210.40 | 146.00       | 103.60             | 28.50 |
| SD     | 530.50 | 299.10 | 217.30 | 289.60       | 281.80             | 37.80 |
