# Supplementary material for: Brain-derived neurotrophic factor, a new soluble biomarker for malignant pleural mesothelioma involved in angiogenesis
Source: Springer Nature journal article supplement (doi:10.1186/s12943-018-0891-0), 2018-10-11

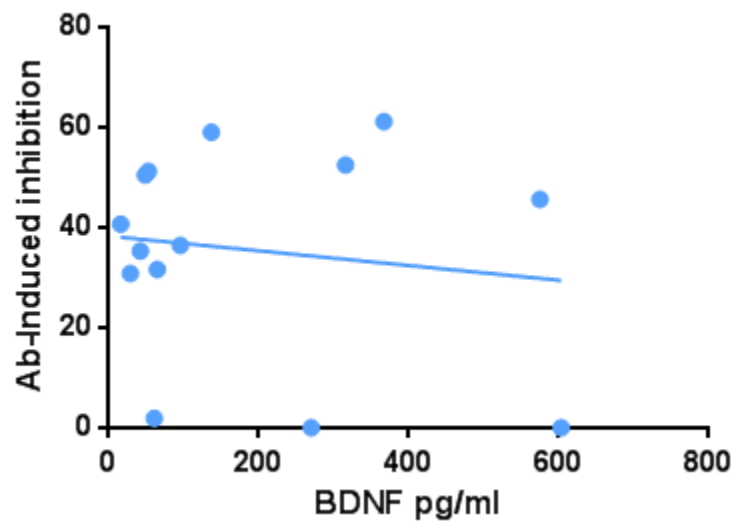

Supplement: MOESM10 [file 16191964]
